# Supplementary material for: SEIPIN Regulates Lipid Droplet Expansion and Adipocyte Development by Modulating the Activity of Glycerol-3-phosphate Acyltransferase
Source: PubMed Central journal article supplement — Cell Rep. Author manuscript; Available in PMC 2017 Oct 18. (PMC5647143; doi:10.1016/j.celrep.2016.10.037), 2016-11-01
Supplement: NIHMS907566-supplement.pdf [file NIHMS907566-supplement.pdf]

## **Supplemental Information**

### **SEIPIN Regulates Lipid Droplet Expansion and Adipocyte Development by Modulating the Activity of Glycerol-3-phosphate Acyltransferase**

**Martin Pagac, Daniel E. Cooper, Yanfei Qi, Ivan E. Lukmantara, Hoi Yin Mak, Zengying Wu, Yuan Tian, Zhonghua Liu, Mona Lei, Ximing Du, Charles Ferguson, Damian Kotevski, Pawel Sadowski, Weiqin Chen, Salome Boroda, Thurl E. Harris, George Liu, Robert G. Parton, Xun Huang, Rosalind A. Coleman, and Hongyuan Yang**

# SEIPIN regulates lipid droplet expansion and adipocyte development through modulating the activity of glycerol-3-phosphate acyltransferase

Martin Pagac, Daniel E. Cooper, Yanfei Qi, Ivan E. Lukmantara, Hoi Yin Mak, Zengying Wu, Yuan Tian, Zhonghua Liu, Mona Lei, Ximing Du, , Charles Ferguson, Damian Kotevski, Pawel Sadowski, Weiqin Chen, Salome Boroda, Thurl E. Harris, George Liu, Robert G. Parton, Xun Huang, Rosalind A. Coleman and Hongyuan Yang

## SUPPLEMENTAL FIGURES

Figure S1. Related to Figures 1 and 2.

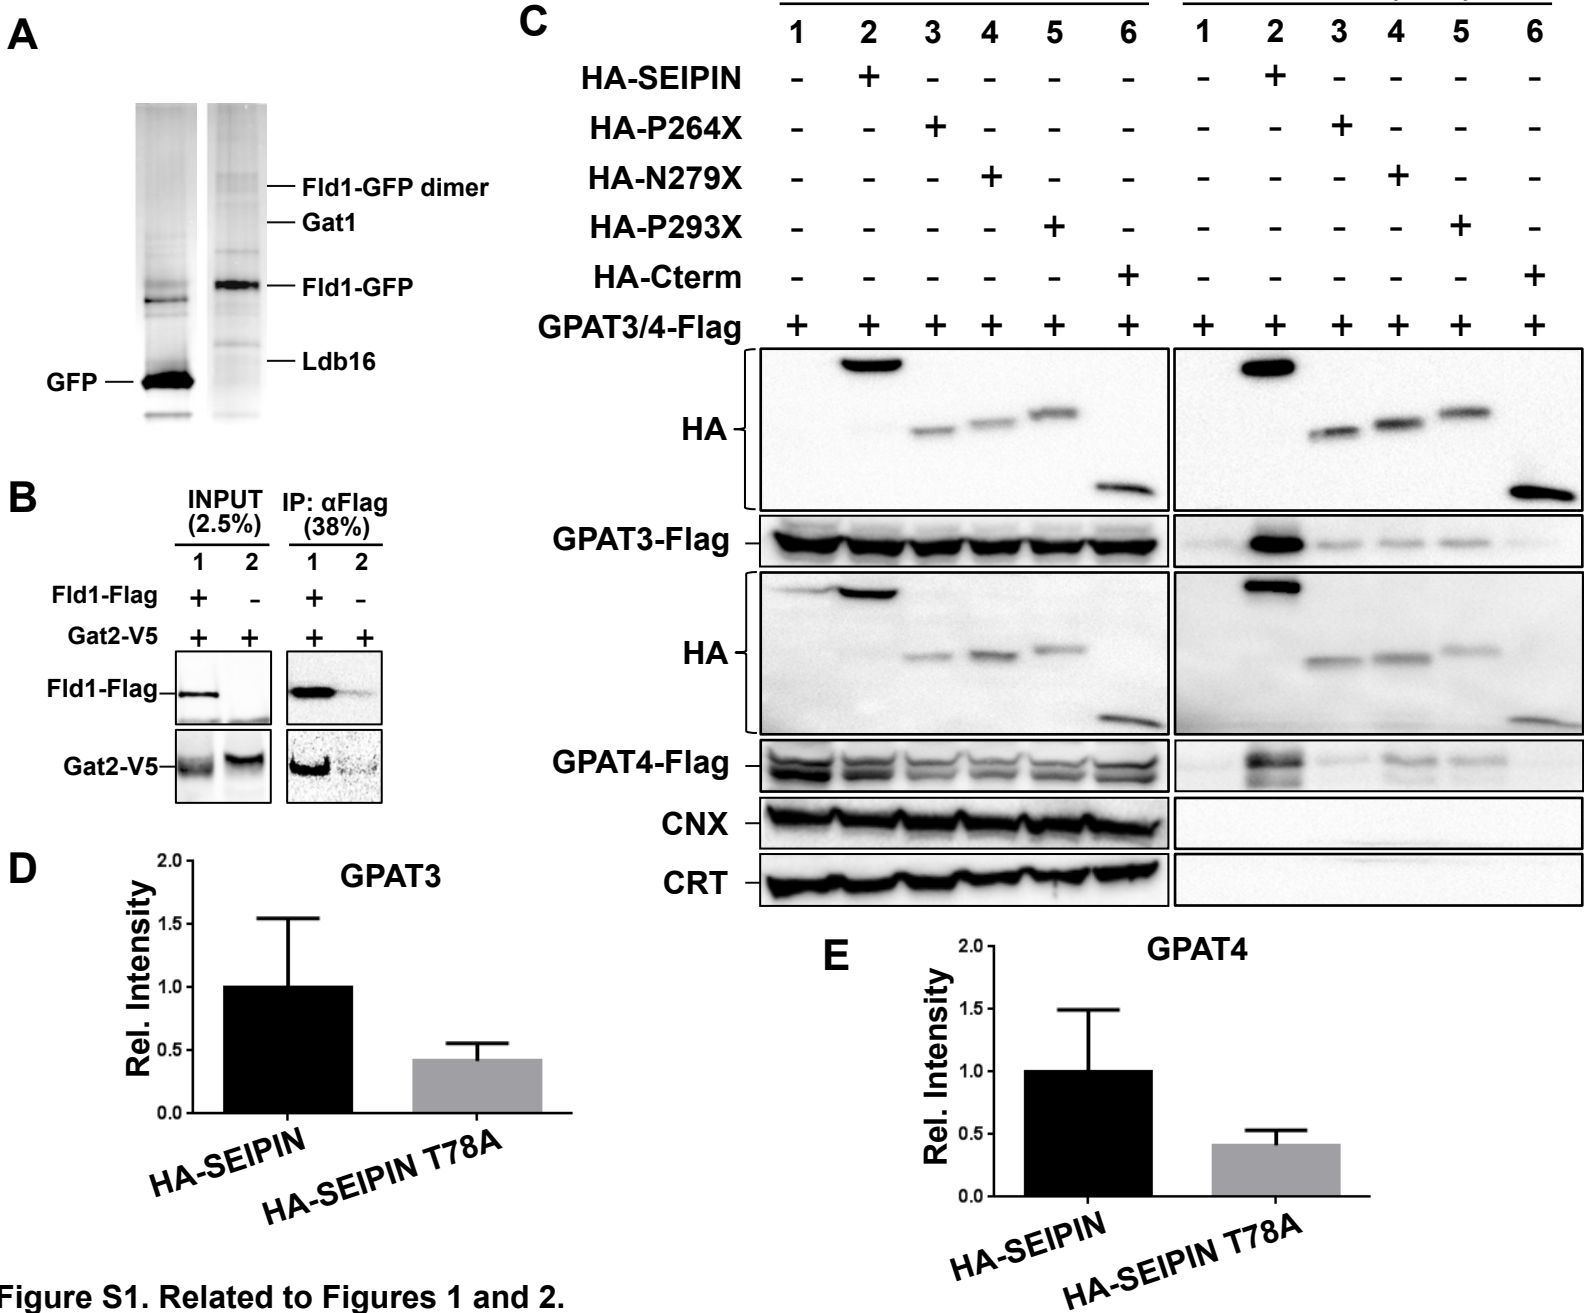

Figure S1. Related to Figures 1 and 2.

A) Coomassie stained SDS-PAGE gel showing yeast proteins that co-eluted with GFP or Fld1-GFP after GFP-Trap affinity purification. See also Table S1. B) Coimmunoprecipitation of endogenous levels of Gat2-V5 and FLAG-Fld1 by Flag antibody from yeast lysates. C) Co-immunoprecipitation analyses of Flag-tagged GPAT3/ GPAT4 with a series of overexpressed HA-tagged C-terminal SEIPIN truncations, and an HA-tagged SEIPIN C-terminus (HA-Cterm). D, E) Western blotting quantification. Relative protein quantification levels for D) Figure 2B (n=3, GPAT3-Flag, co-immunoprecipitated with HA-SEIPIN relative to co-immunoprecipitated with HA-T78A), (E) Figure 2C (n=3, GPAT4-Flag, co-immunoprecipitated with HA-SEIPIN relative to co-immunoprecipitated with HA-T78A). \*p<0.05, paired t-test, data are shown as mean ± SEM.

**Figure S2. Related to Figure 2.**

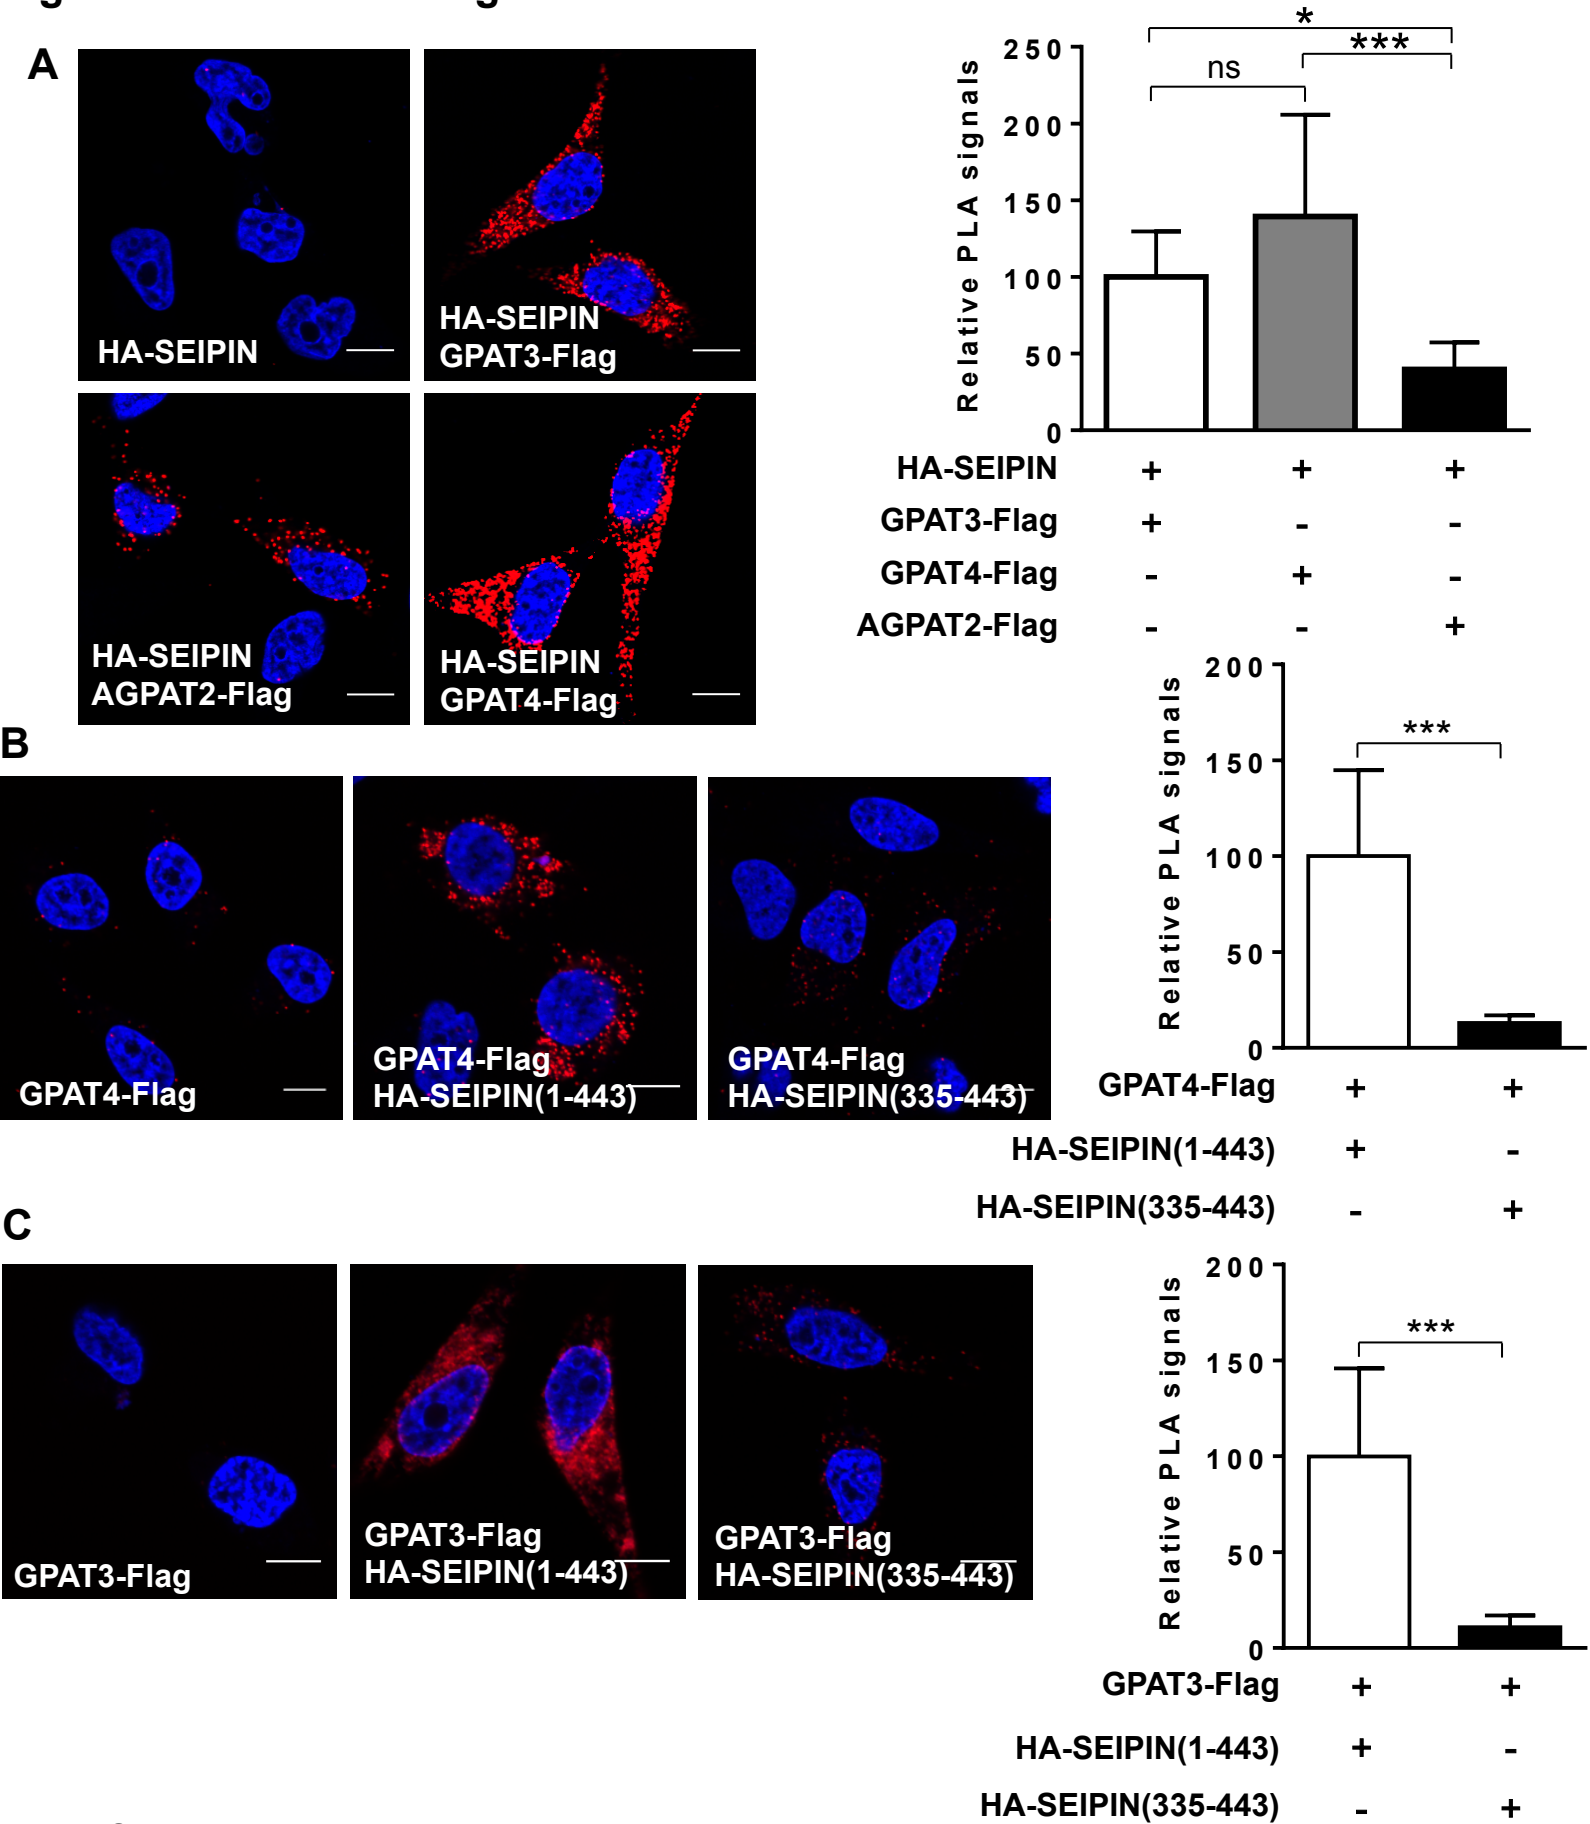

**Figure S2. Related to Figure 2.**

A, B, C) Proximity ligation assay (PLA) of the indicated full-length HA-SEIPIN, HA-SEIPIN truncation (1-443), and HA-tagged C-terminus of SEIPIN (335-443), respectively, and Flag-tagged GPAT4 or GPAT3 or AGPAT2 pairs, respectively, in HeLa cells. Representative images (n=3) are shown. Scale bar: 10  $\mu$ m. Quantification of PLA assay is described in Experimental procedures. Means  $\pm$ SD of PLA signal per cell are shown (\*p < 0.05; \*\*\*p < 0.001), one-way ANOVA and student's T-test, n=3.

Figure S3. Related to Figure 2.

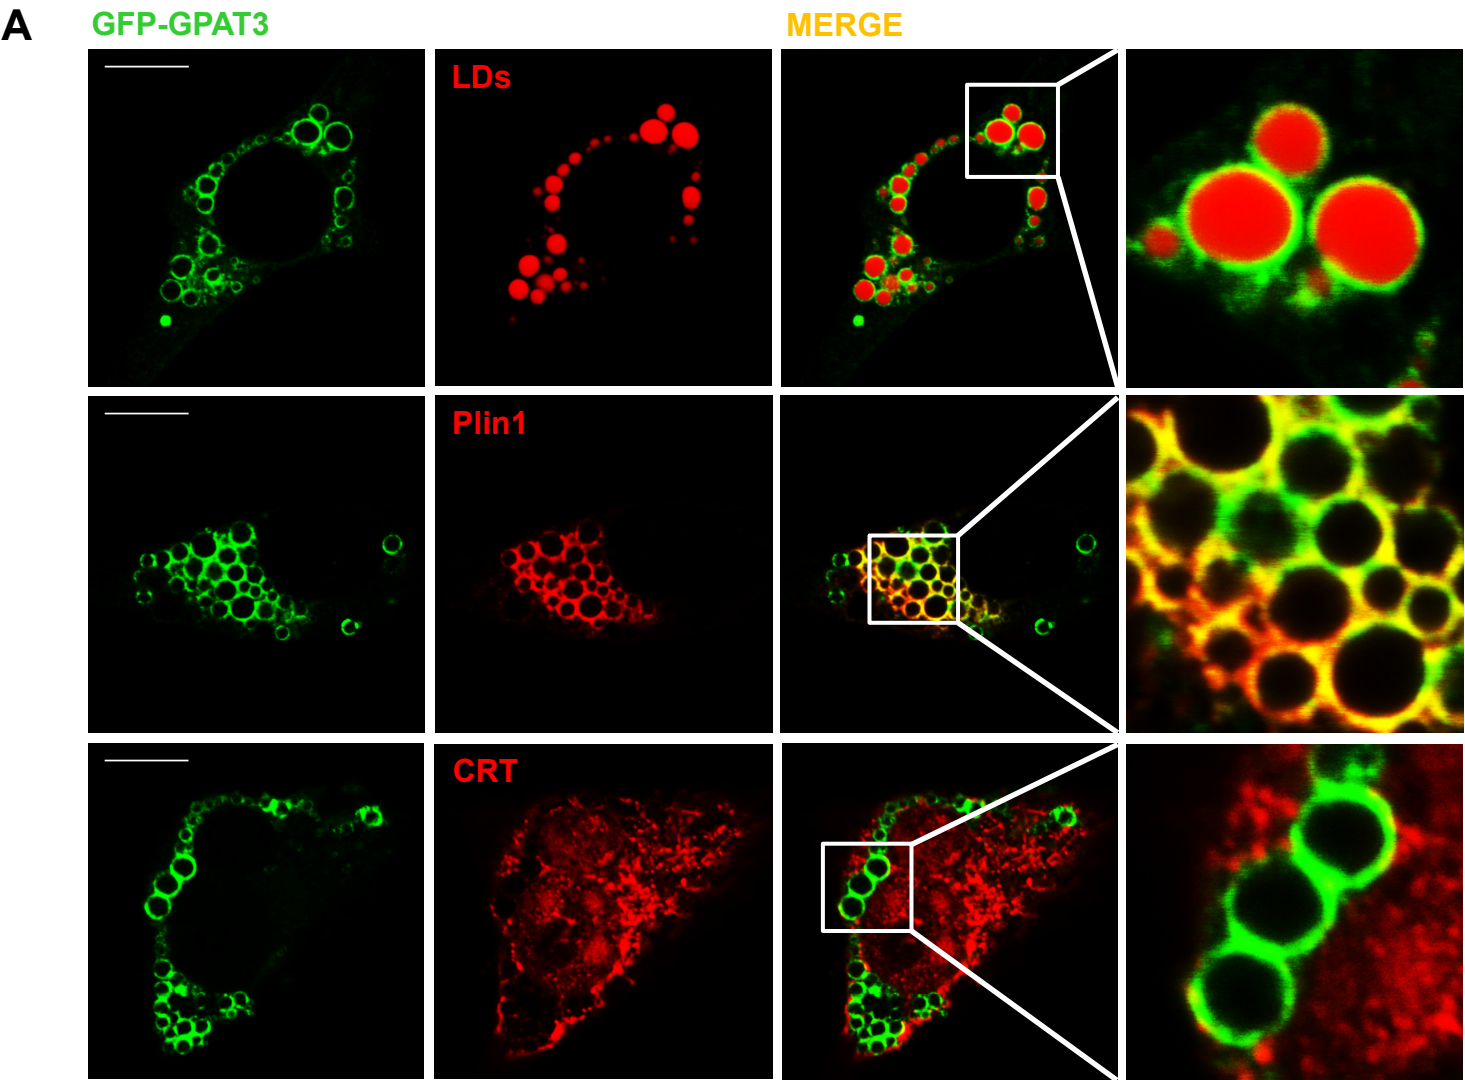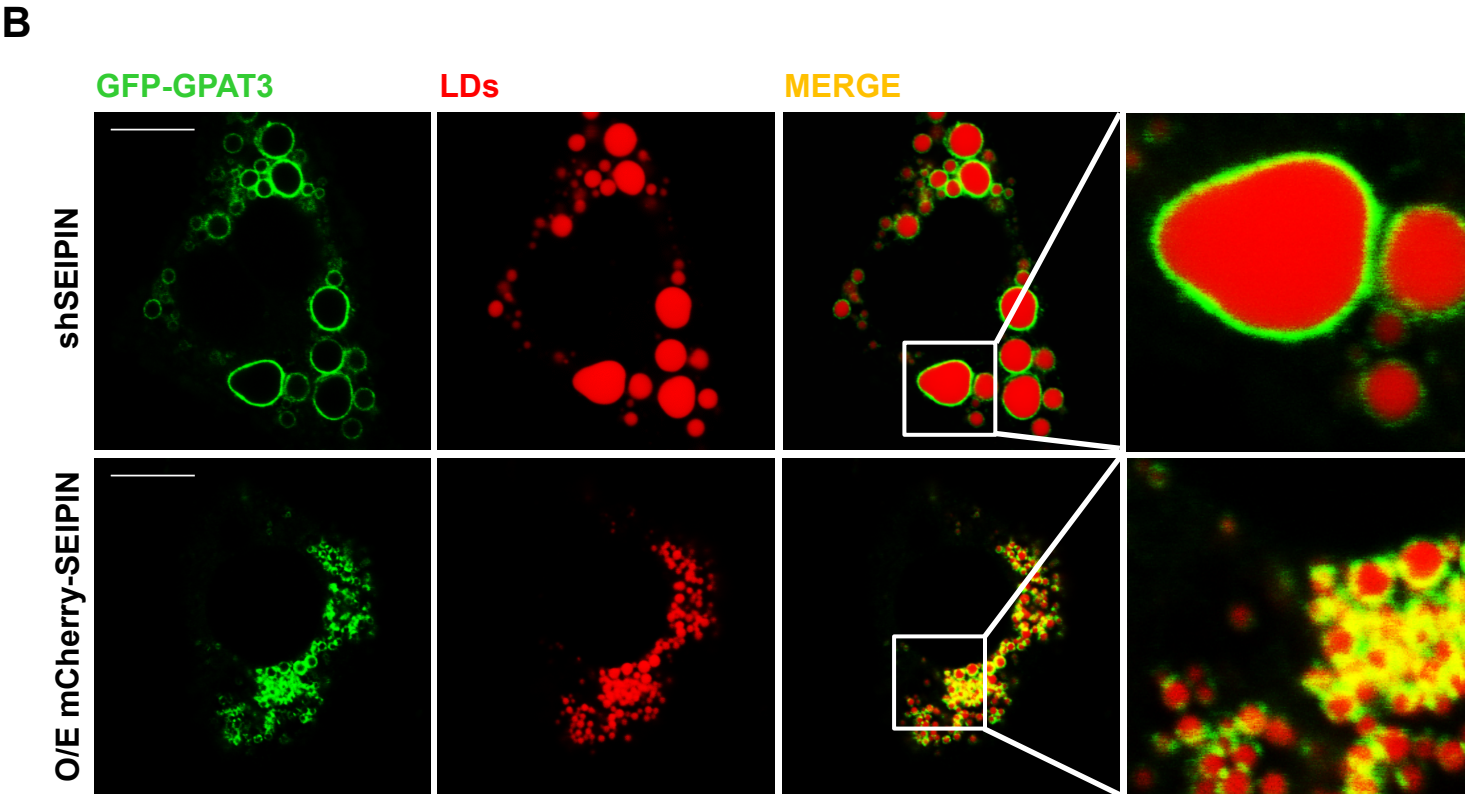

**Figure S3 (continued). Related to Figure 2.**

**C**

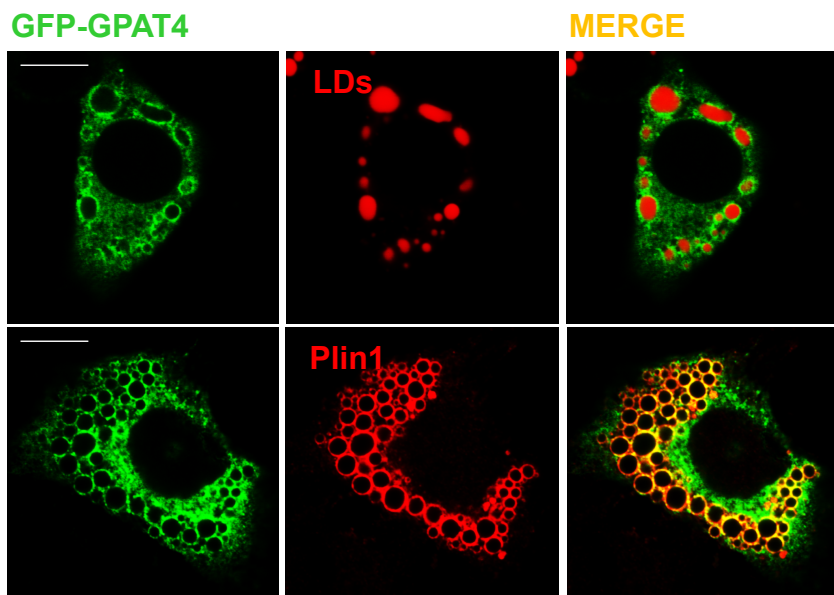

**D**

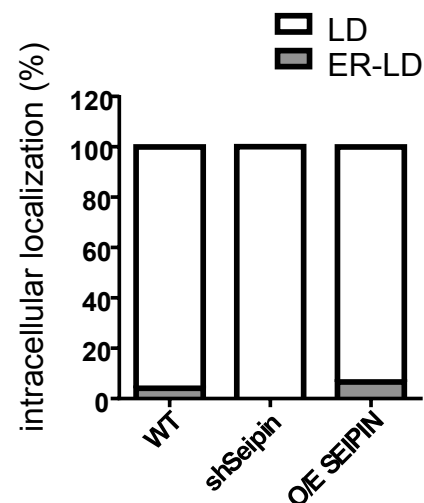

**E**

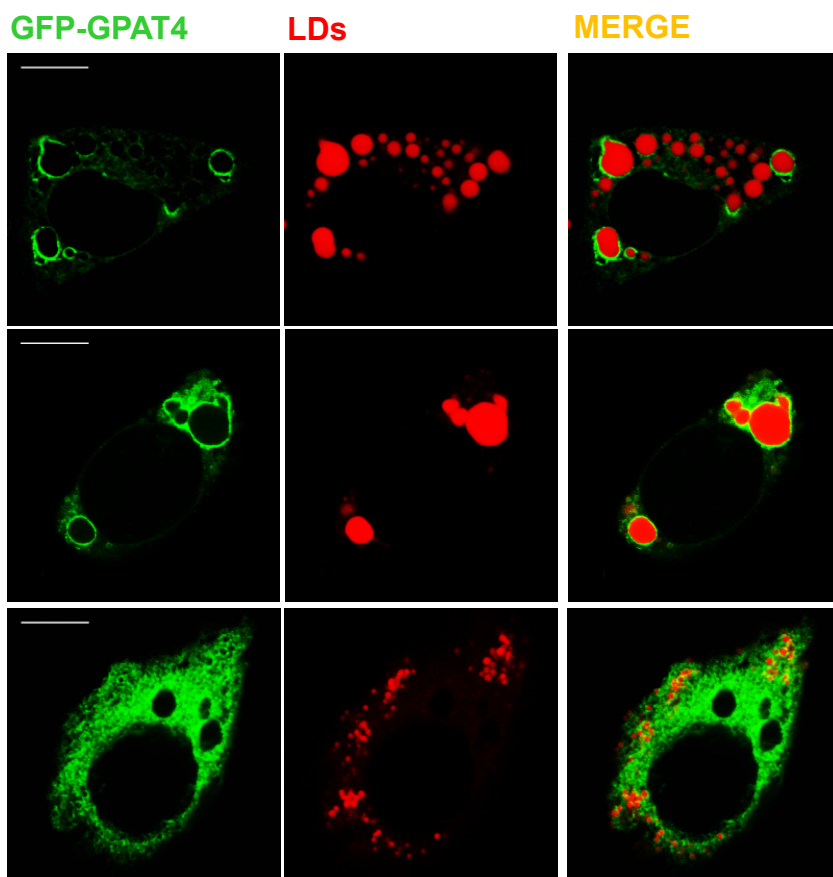

**F**

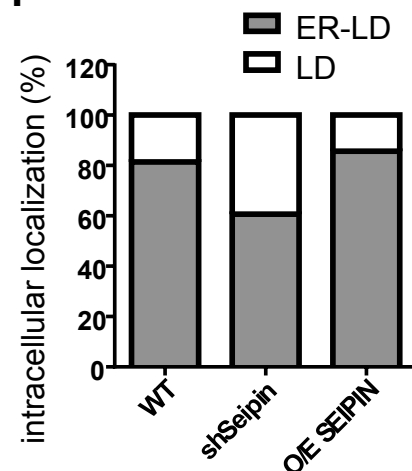

**Figure S3. Related to Figure 2.**

Variations of SEIPIN expression alter subcellular localization of GPAT4, but not GPAT3, in preadipocytes. Co-localization of GPAT3 (A) with ER marker CRT (calreticulin) and LD surface protein Plin1 (Perilipin 1) and of GPAT4 (C) with Plin1. 3T3-L1 preadipocytes were co-transfected with FLAG-Plin1 and GFP-GPAT3/GFP-GPAT4 for 48h, followed by incubation with 400  $\mu$ M oleate for 16h. FLAG-Plin1 and CRT were labelled by immunofluorescence staining using FLAG and CRT antisera, respectively. LDs were stained using LipidTox. B, E) Localization of GPAT3 (B) and GPAT4 (E) was also examined in shSEIPIN (SEIPIN knockdown) or O/E mCherry-SEIPIN (overexpressed mCherry-tagged SEIPIN) 3T3-L1 preadipocytes in the presence of LipidTox stained LDs. 3T3-L1 preadipocytes with lentiviral-based stable knockdown of SEIPIN or transiently transfected with mCherry-SEIPIN were co-transfected with either GFP-GPAT3 or GFP-GPAT4, followed by incubation with 400  $\mu$ M oleate for 16h. Images were taken using confocal microscope. Bar = 10  $\mu$ m. D, F) The percentage of cells with different intracellular localization patterns, either LD only or both ER and LD, was quantified from more than 25 images in each group setting.

**Figure S4. Related to Figure 3.**

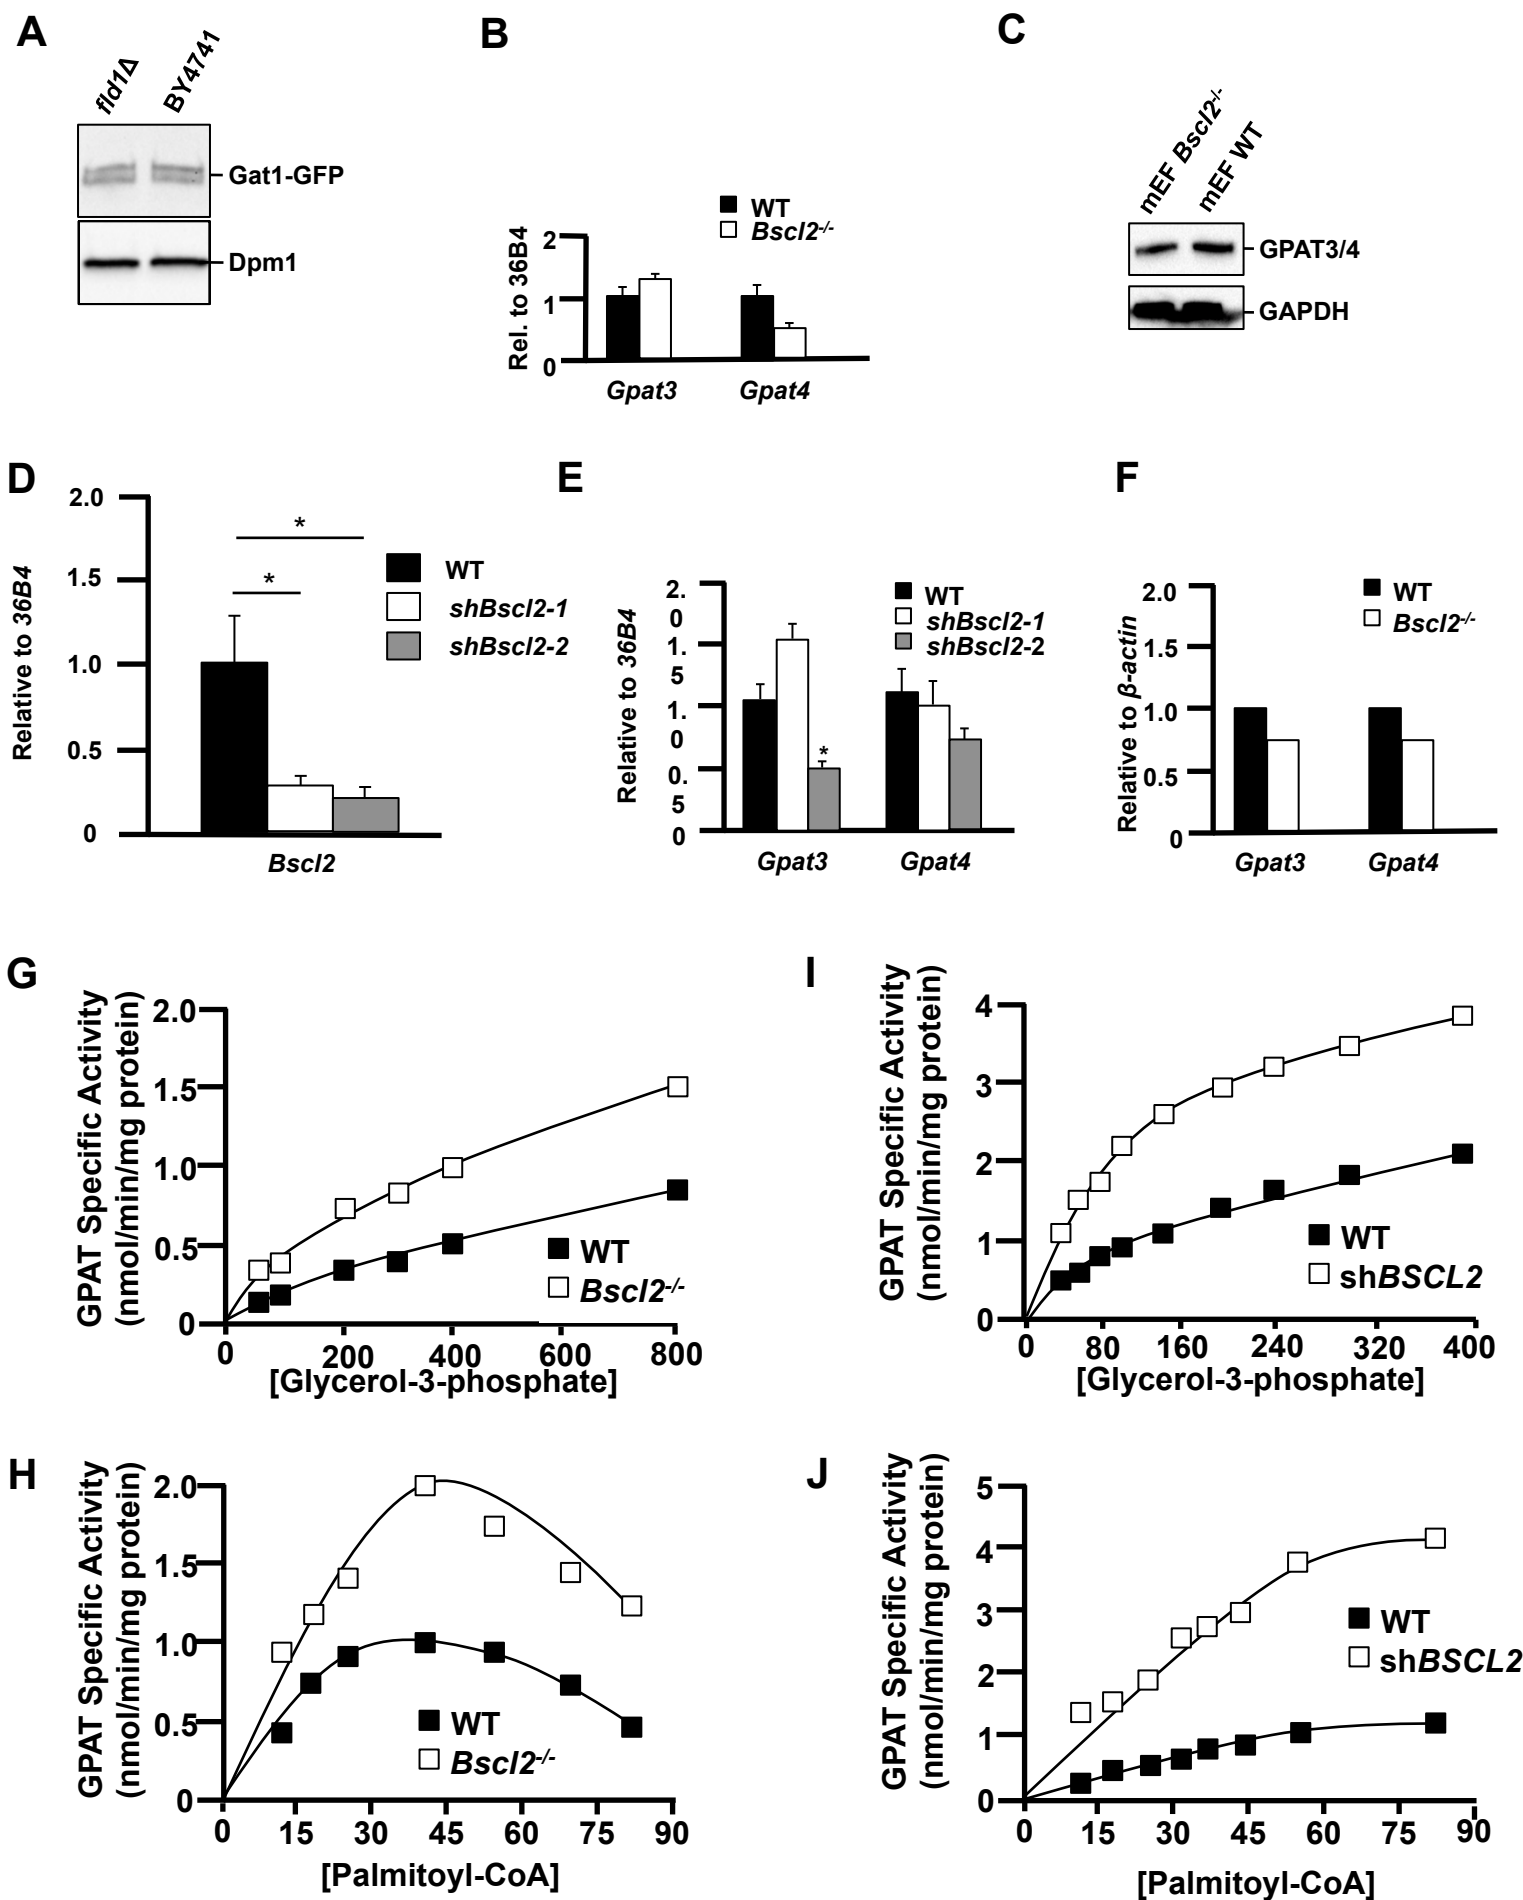

**Figure S4 (continued). Related to Figure 3.**

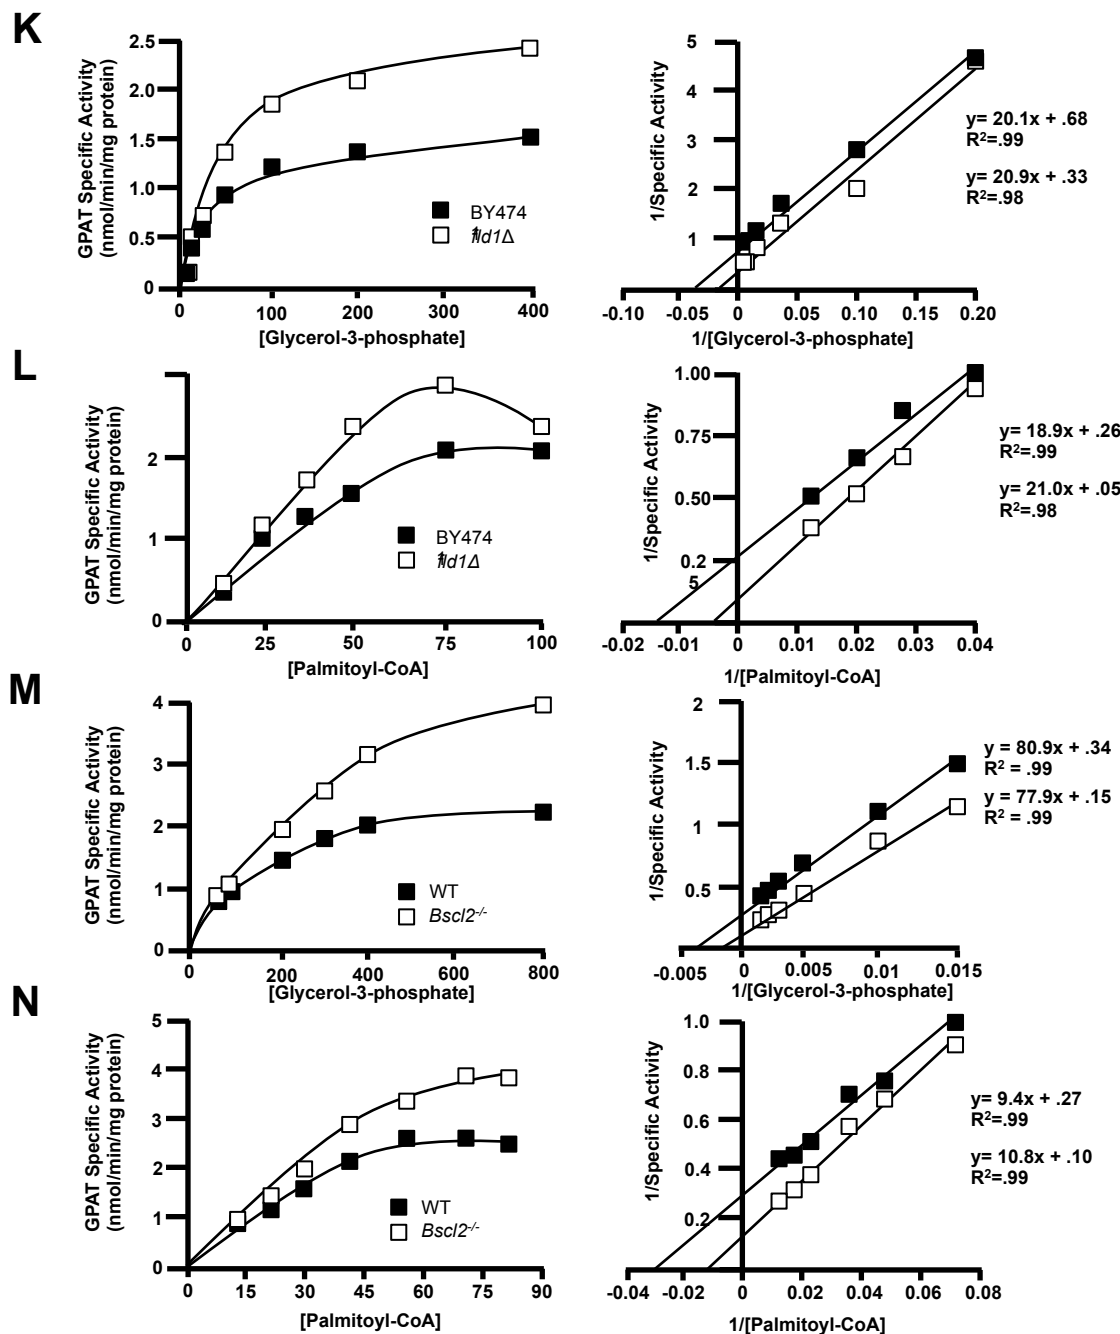

**Figure S4. Related to Figure 3.**

A) Immunoblot for Gat1-GFP in BY4741 and *fld1Δ* yeast. B) mRNA and C) protein levels of GPAT3/ GPAT4 in control and *Bsc12<sup>-/-</sup>* MEFs. D) *Bsc12* mRNA and E) *Gpat3* and *Gpat4* mRNA expression in control and *shBsc12*-infected 3T3-L1 preadipocytes. F) mRNA of *Gpat3* and *Gpat4* in control and *Bsc12<sup>-/-</sup>* testis. mRNA expression normalized to *36B4* or  $\beta$ -actin as indicated. Dpm1 and GAPDH used as protein loading controls as indicated. Data are presented as mean  $\pm$  S.E.M. GPAT dependence on glycerol-3-phosphate or Palmitoyl-CoA in G, H) control and *Bsc12<sup>-/-</sup>* testis, I, J) control and *shBSC12* 3T3-L1 preadipocytes. Glycerol-3-phosphate and Palmitoyl-CoA concentrations were varied as indicated. All experiments were performed in triplicate. GPAT dependence on glycerol-3-phosphate or Palmitoyl-CoA and double-reciprocal plots in K, L) BY4741 and *fld1Δ* yeast, M, N) control and *Bsc12<sup>-/-</sup>* MEFs. All experiments were performed in triplicate. Data are presented as mean  $\pm$  S.E.M.

**Figure S5. Related to Figure 4.**

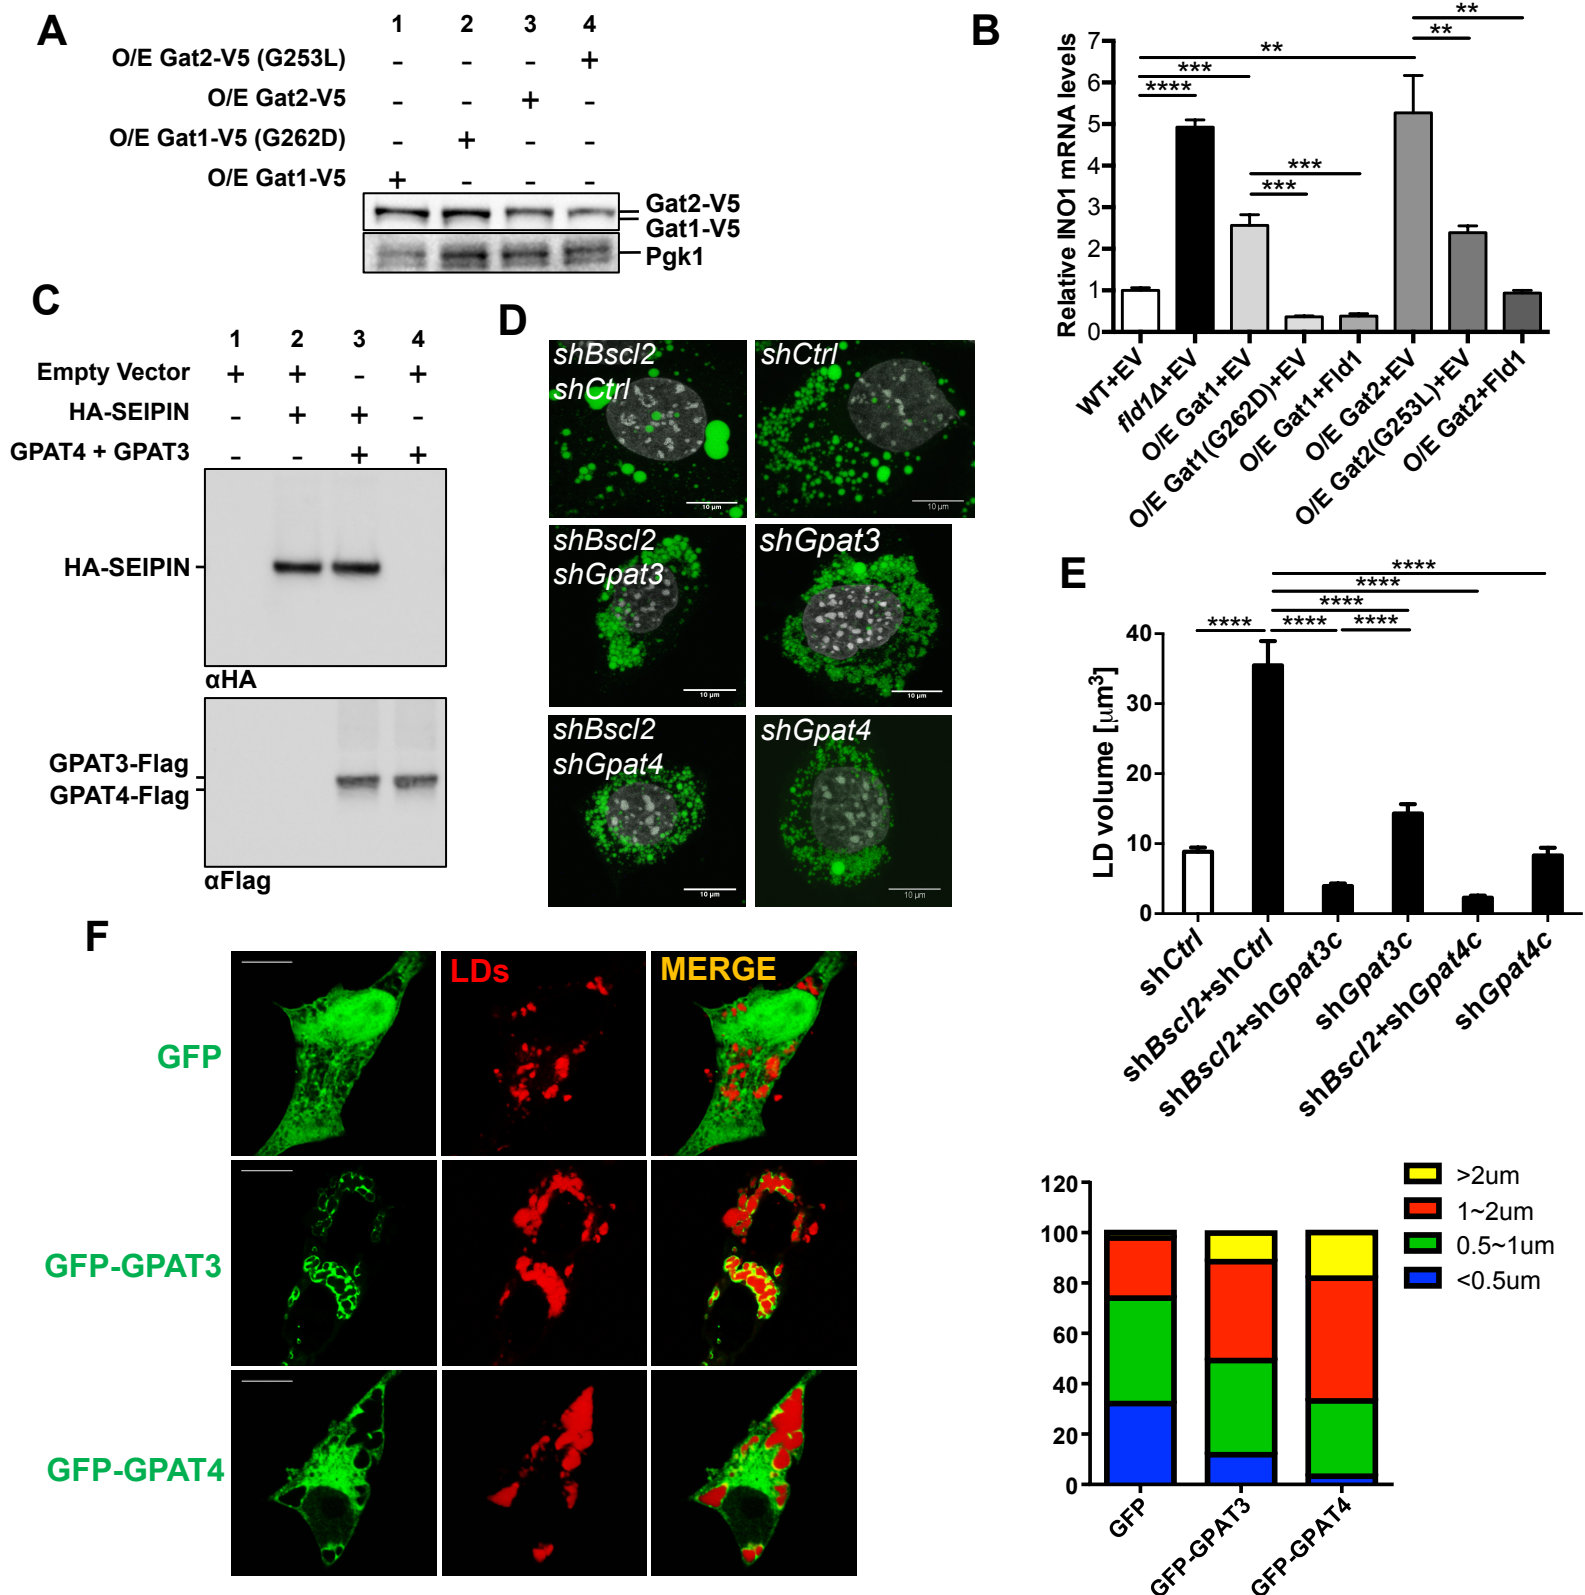

**Figure S5. Related to Figure 4.**

A) Protein level comparison of Gat1-V5 vs. Gat1-V5 (G262D), and Gat2-V5 vs. Gat2-V5 (G253L) by anti-V5 Western blot analysis. B) qRT-PCR analysis of *INO1* mRNA levels in yeast strains (shown in Figure 4A) grown to exponential growth phase. *INO1* mRNA levels were normalized with *TCM1* mRNA levels. Data represent mean  $\pm$  SD, significance was determined by one-way ANOVA multiple-comparison analysis (\*\* $p < 0.001$ , \*\*\* $p < 0.0005$ , \*\*\*\* $p < 0.0001$ ). C) Immunoblots for HA-SEIPIN, Flag-tagged GPAT3 and GPAT4 in 3T3-L1 preadipocytes. D) BODIPY-stained LDs in 3T3-L1 preadipocytes, transduced with shRNA-mediated knock-down vectors and incubated with 800  $\mu\text{M}$  oleate for 16 h. Representative confocal images are shown. E) Diameters of top 3 largest lipid droplets in 100 of each cell line were measured to determine the droplet volumes. Data represent mean  $\pm$  SD (\*\*\*\* $p < 0.0001$ ). F) Confocal microscopy images of Huh7 cells overexpressing GFP-GPAT3, GFP-GPAT4, or GFP alone. LD diameter quantifications from GFP, GFP-GPAT3, and GFP-GPAT4 groups, respectively.

Figure S6. Related to Figure 6.

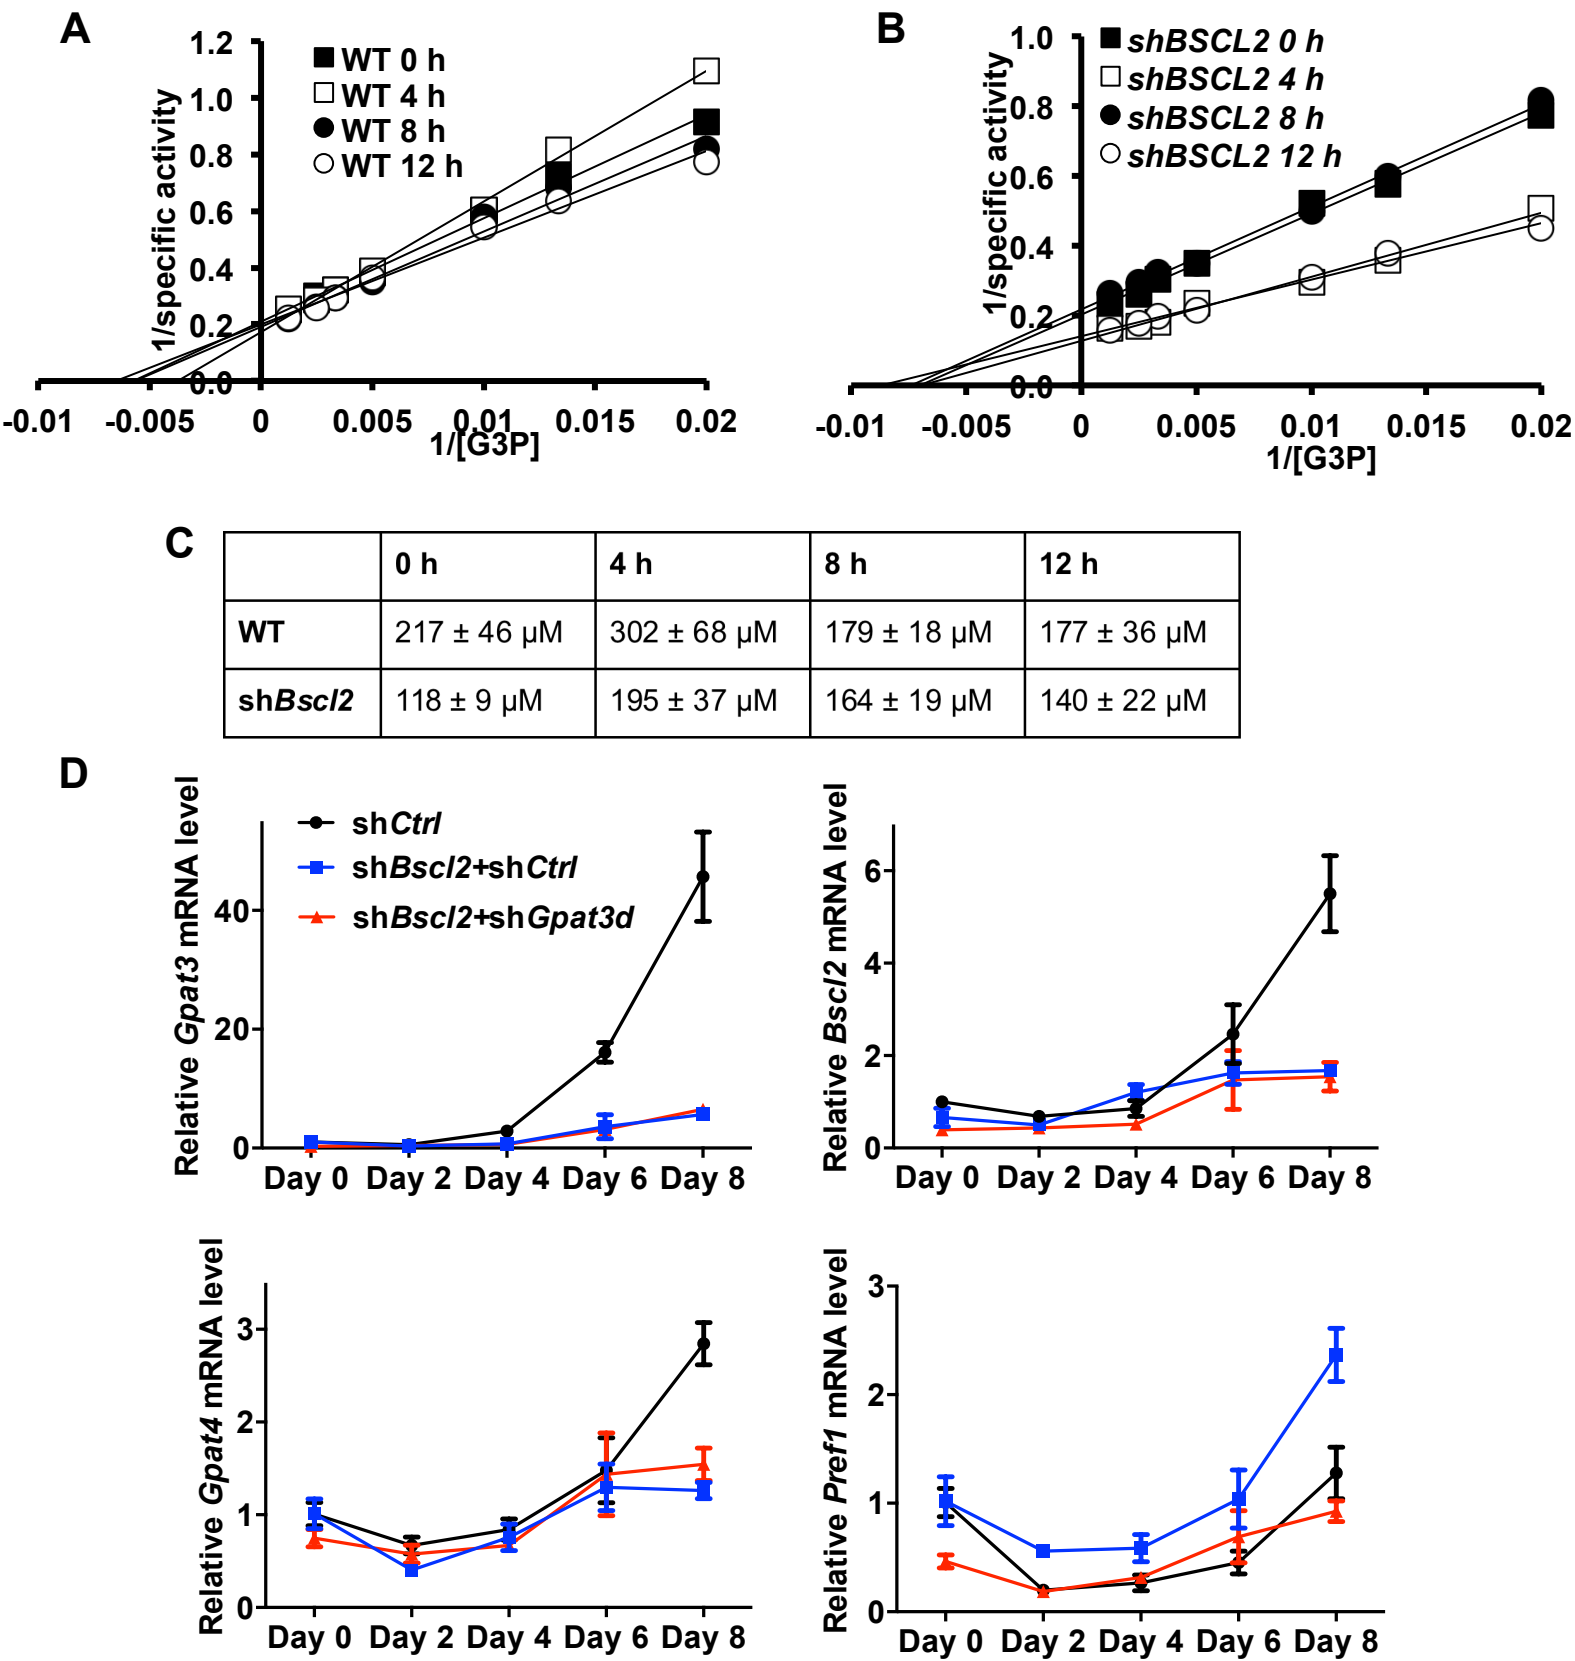

FIGURE S5. Related to Figure 6.

A, B) Control and *shBSCl2* 3T3L1 preadipocytes were differentiated for 0, 4, 8, or 12 h, and GPAT dependence on glycerol-3-phosphate was determined. Data are presented as double-reciprocal plots. n=3 from independent cell passages and differentiation time courses. C) Summary table of apparent Km values for glycerol-3-P. D) *Gpat3*, *Gpat4*, *Bsc12*, and *Pref1* mRNA levels were measured by qRT-PCR in 3T3-L1 cells transduced with the indicated lentiviral knock-down vectors at the indicated time-points post-differentiation induction (see Figure 6D).

**Figure S7. Related to Figure 6.**

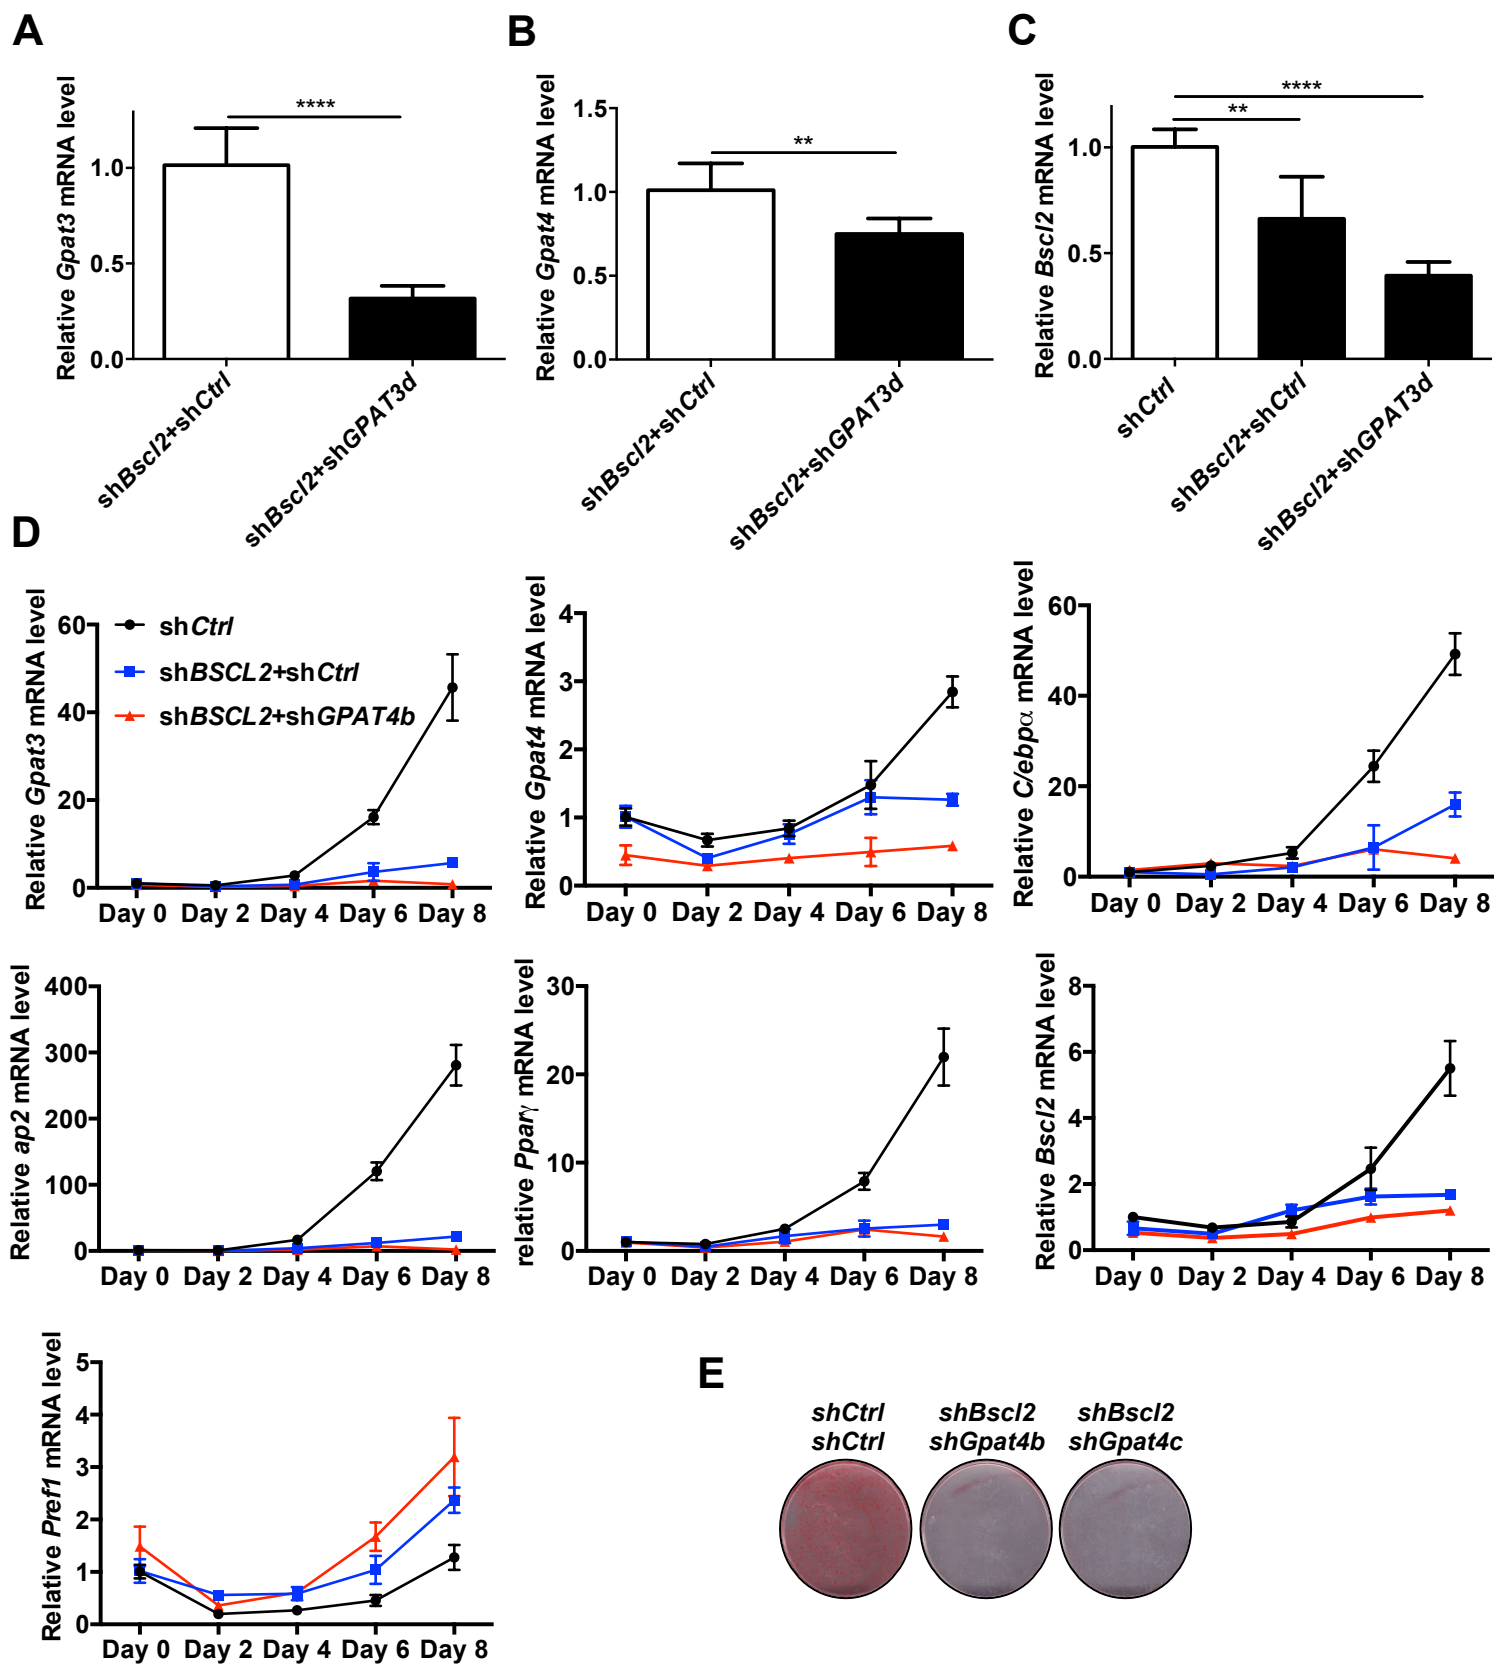

**Figure S7 (continued). Related to Figure 6.**

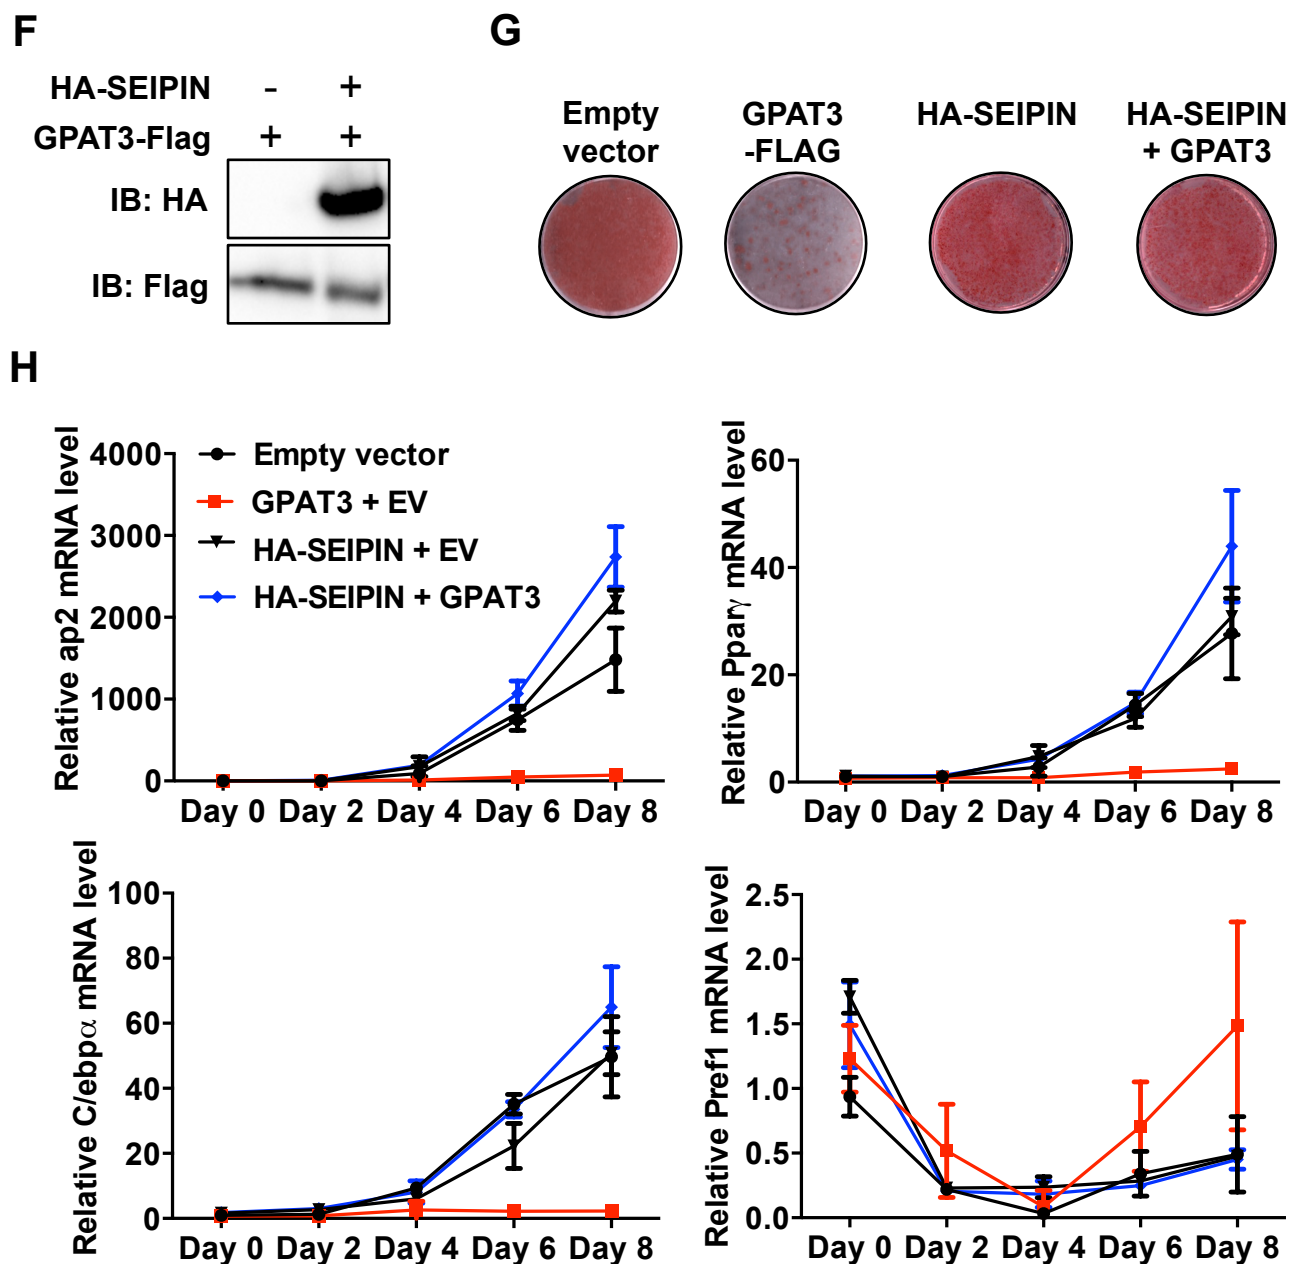

**FIGURE S7. Related to Figure 6.**

A-C) mRNA levels of *Gpat3*, *Gpat4* and *Bscl2* in 3T3-L1 cells used for the differentiation experiments described in Figure 6. mRNA expression normalized to *36B4*. Data are presented as mean  $\pm$  SD (\*\* $p < 0.001$ , \*\*\*\* $p < 0.0001$ ), one-way ANOVA test.

D) Indicated mRNA levels were measured by qRT-PCR in 3T3L1 cells transduced with the indicated double *shRNA* vectors at the indicated time-points after induction of differentiation. E) Oil red O stains of differentiated/undifferentiated 3T3-L1 cells stably transfected with the indicated lentiviral knock-down vectors. F) Immunoblots for HA-SEIPIN and Flag-tagged GPAT3 in 3T3-L1 preadipocytes used for differentiation experiments. G) Oil red O staining. 3T3-L1 preadipocytes were stably transfected with pBABE-puro empty vector, GPAT3-Flag and/or HA-SEIPIN, then differentiated for 8 days. H) Same as in Figure S7D), except that 3T3L1 cells were transduced with with the indicated lentiviral expression vectors. EV: Empty Vector control.

**Figure S8: Model of SEIPIN Function**

**Normal Adipogenesis**

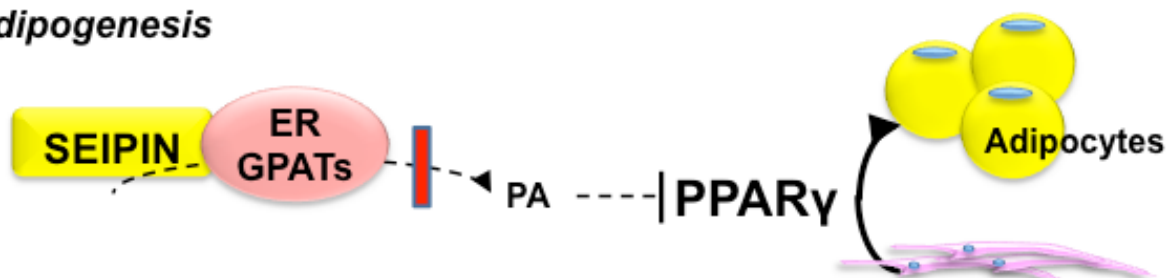

**SEIPIN Deficiency**

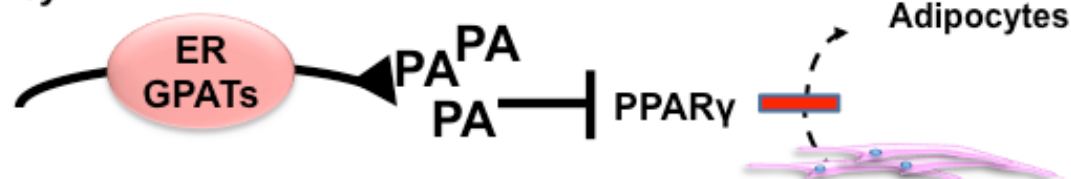

**Controlled Lipid Droplet Size**

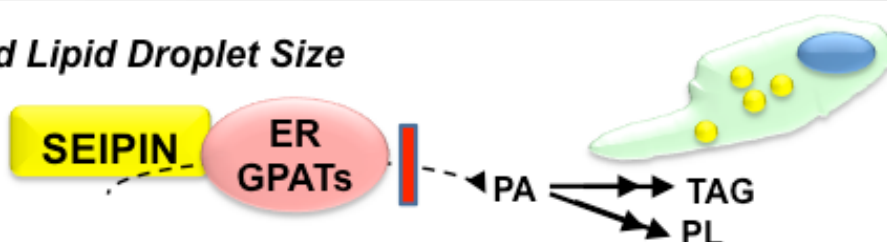

**SEIPIN Deficiency**

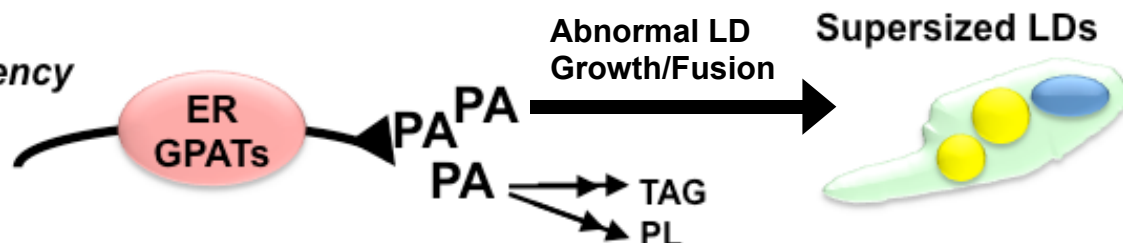

**FIGURE S8. MODEL OF SEIPIN FUNCTION.**

In preadipocytes, SEIPIN interacts with the ER GPAT isoforms to decrease their specific activity. This inhibition diminishes the over-production of toxic lipid intermediates, e.g. phosphatidic acid (PA), which would otherwise block PPAR $\gamma$ -mediated adipogenesis. In non-preadipocytes, the SEIPIN-GPAT interaction limits the size of LDs, at least in part, by reducing the production of the fusogenic lipid, PA.

# SUPPLEMENTAL TABLES

**Table S1. Related to Figure 1**

| Gene                      | Protein function                                                                                    | Cellular localization         |
|---------------------------|-----------------------------------------------------------------------------------------------------|-------------------------------|
| <b>GAT1/<br/>GPT2</b>     | Glycerol-3 phosphate/dihydroxyacetone phosphate <i>sn-1</i> acyltransferase                         | Lipid droplets and ER         |
| <b>LDB16</b>              | Putative yeast SEIPIN homologue                                                                     | ER                            |
| <b>SCJ1</b>               | Homologue of bacterial chaperone DnaJ                                                               | ER lumen                      |
| <b>DFM1</b>               | Der1-like Family Member involved in ERAD                                                            | ER                            |
| <b>NSG2</b>               | Protein involved in regulation of sterol biosynthesis                                               | ER                            |
| <b>ERG3</b>               | C-5 sterol desaturase; glycoprotein that catalyzes the introduction of a double bond into episterol | ER lumen                      |
| <b>SVP26</b>              | Involved in COP II vesicle transport                                                                | ER and Golgi                  |
| <b>PSE1</b>               | Karyopherin/importin that interacts with the nuclear pore complex                                   | Nuclear pore                  |
| <b>SXM1</b>               | Nuclear transport factor (karyopherin)                                                              | Nuclear pore                  |
| <b>KAP123/11<br/>4/95</b> | Karyopherin                                                                                         | Nuclear pore                  |
| <b>PEX30</b>              | Negative regulator of peroxisome number                                                             | Peroxisome                    |
| <b>ANT1</b>               | Peroxisomal adenine nucleotide transporter                                                          | Peroxisome                    |
| <b>ERP1</b>               | Member of the p24 family involved in ER to Golgi transport                                          | COPII vesicles                |
| <b>SEC7</b>               | Guanine nucleotide exchange factor (GEF) for ADP ribosylation factors                               | Cytoplasm and Golgi           |
| <b>GET4</b>               | Protein involved in inserting tail-anchored proteins into ER membranes                              | Cytoplasm                     |
| <b>FKS1</b>               | Catalytic subunit of 1,3-beta-D-glucan synthase                                                     | Sites of cell wall remodeling |
| <b>YDR476C</b>            | Dubious open reading frame                                                                          | unknown                       |
| <b>YMR147W</b>            | unknown                                                                                             | unknown                       |
| <b>YLR312C</b>            | unknown                                                                                             | unknown                       |

**Table S1. Related to Figure 1.**

Table listing nineteen proteins that were identified by Tandem mass spectrometry analysis to coimmunoprecipitate with Fld1-GFP.

**Table S2. Related to Figure 3**

| Tissue/Cells                |                            | Substrate       |                   |                 |                   |
|-----------------------------|----------------------------|-----------------|-------------------|-----------------|-------------------|
|                             |                            | G-3-P           |                   | 16:0-CoA        |                   |
|                             |                            | Km <sup>1</sup> | Vmax <sup>2</sup> | Km <sup>1</sup> | Vmax <sup>2</sup> |
| yeast                       | Wildtype                   | 29.4 ± 01.0     | 1.5 ± 0.1         | 72.3 ± 21.5     | 3.8 ± 1.4         |
|                             | <i>fld1Δ</i>               | 62.6 ± 11.1*    | 3.0 ± 0.4         | 384.9 ± 74.6*   | 18.3 ± 3.8*       |
| mouse embryonic fibroblasts | Wildtype                   | 241.3 ± 45.1    | 3.0 ± 0.5         | 34.8 ± 16.6     | 3.7 ± 1.7         |
|                             | <i>Bscl2<sup>-/-</sup></i> | 517.9 ± 26.8*   | 6.8 ± 0.6*        | 107.8 ± 31.4*   | 10.0 ± 3.0*       |
| 3T3L1 preadipocytes         | Control                    | 216.6 ± 46.2    | 3.1 ± 1.6         | 205.0 ± 43.2    | 3.1 ± 0.7         |
|                             | sh <i>BSCL2</i>            | 117.6 ± 08.9*   | 5.4 ± 1.8*        | 107.8 ± 11.4*   | 8.3 ± 0.7*        |
| testis                      | Wildtype                   | 578.1 ± 34.0    | 1.2 ± 0.2         | 111.5 ± 24.9    | 3.9 ± 0.8         |
|                             | <i>Bscl2<sup>-/-</sup></i> | 454.2 ± 25.3*   | 2.2 ± 0.3*        | 58.4 ± 09.2     | 4.2 ± 0.9         |

<sup>1</sup>μM, <sup>2</sup>nmol/min/mg protein

**Table S2. Related to Figure 3.**

Summary of apparent Km and Vmax values for each of GPATs substrates, glycerol-3-phosphate and C16:0-CoA. All experiments were performed in triplicate. Data are presented as mean ± S.E.M. \*p<.05, student's T-test.

**Table S3. Primer sets used for plasmid constructions and for site-directed mutagenesis. Related to Experimental Procedures and Figures 2 and 4.**

| <b>Primer ID</b> | <b>5'-3' sequence</b>                                                                                               | <b>Cut site</b> | <b>Purpose</b>                                                  | <b>Origin</b> |
|------------------|---------------------------------------------------------------------------------------------------------------------|-----------------|-----------------------------------------------------------------|---------------|
| F-GAT1-V5        | AAAAAAGCTTAGCGTGTA<br>CAATAGTCTCTGCTTAAG                                                                            | HindIII         | Cloning of<br>GAT1-V5 into<br>YCplac111                         | This study    |
| R-GAT1-V5        | AAAAGGATCCTCAACCG<br>GTACGCGTAGAATCGAG<br>ACCGAGGAGAGGGTTAG<br>GGATAGGCTTACCACCTT<br>CTTCTTTTCGTGTTCTCT<br>TTTCTGTC | BamHI           | "                                                               | This study    |
| F-GAT2-V5        | AAAAAAGCTTATTCTGCC<br>GCCGAACTACTTAAC                                                                               | HindIII         | Cloning of<br>GAT2-V5 into<br>YCplac111                         | This study    |
| R-GAT2-V5        | AAAAGGATCCTCAACCG<br>GTACGCGTAGAATCGAG<br>ACCGAGGAGAGGGTTAG<br>GGATAGGCTTACCACCC<br>GCATCTCCTTCTTCCCT<br>TCTTCTTC   | BamHI           | "                                                               | This study    |
| F-FLD1-YCp       | AAAAAAGCTTTTACCATG<br>CACGTTGTCG                                                                                    | HindIII         | Cloning of<br>FLD1-Flag<br>into<br>YCplac111<br>and<br>YCplac33 | This study    |
| R-FLD1-YCp       | AAAAAGGATCCTCAGATC<br>TTATCGTCGTCATCCTTG<br>TAATCCATCGAGCTATGT<br>TTCTTGGATTTTTC                                    | BamHI           | "                                                               | This study    |
| F-GAT2           | CAGCTAAGCTTATAATGC<br>CTGCACCAAACTCACG<br>G                                                                         | HindIII         | Cloning of<br>GAT2-V5 into<br>pYES2NTB                          | This study    |
| R-GAT2           | CAGCTGCGGCCGCTCGA<br>GCGCATCTCCTTCTTTCC<br>CTTC                                                                     | NotI            | "                                                               | This study    |
| F-GPAT4          | AGAATGGATCCATGTTCC<br>TGTTGCTACCTT                                                                                  | BamHI           | Cloning of<br>GPAT4-Myc-<br>Flag into<br>pBABE-puro             | This study    |
| R-GPAT4          | AATATGTCGACTTAAACC<br>TTATCGTCGTCA                                                                                  | Sall            | "                                                               | This study    |
| F-GPAT3          | AGAATGGATCCATGGAG<br>GGCGCAGACCTGG                                                                                  | BamHI           | Cloning of<br>GPAT3-Myc-<br>Flag into<br>pBABE-puro             | This study    |
| R-GPAT3          | AATATGTCGACTTAAACC<br>TTATCGTCGTCA                                                                                  | Sall            | "                                                               | This study    |

**Table S3 (continued). Primer sets used for plasmid constructions and for site-directed mutagenesis.**

**Related to Experimental Procedures and Figures 2 and 4.**

| Primer ID      | 5'-3' sequence                                 | Purpose                         | Origin              |
|----------------|------------------------------------------------|---------------------------------|---------------------|
| F-GAT1-G262D   | TATTTTCCCCGAGGGTGATTCTCATGACCGTCCTTC           | Active site mutation            | This study          |
| R-GAT1-G262D   | GAAGGACGGTCATGAGAATCACCCCTCGGGGAAAATA          | "                               | This study          |
| F-GAT2-G253L   | GGGATCTTTCCTGAACTTGGGTCCCA CGACAGAAC           | "                               | This study          |
| R-GAT2-G253L   | GTTCTGTCGTGGGACCCAAGTTCAGGAAAGATCCC            | "                               | This study          |
| F-T78A         | GGACAGACTGTGATTCTCCGCCGCC TCTCTCTGCTCTTTCCC    | Mutation in HA-SEIPIN           | This study          |
| R-T78A         | GGGAAAGAGCAGAGAGAGGCGGCGGAGGAATCACAGTCTGTCC    | "                               | This study          |
| F-A212P        | AAGCGCATCCAGATGTATGGACCCTA CCTCCGGATCCATGCCAC  | "                               | This study          |
| R-A212P        | GTGGGCATGGATCCGGAGGTAGGGT CCATACATCTGGATGCGCTT | "                               | This study          |
| F-SEIPIN-P264X | TGGGGTGCTGTCTGGTGACGCCACCG CTTCTC              | C-terminal truncation of SEIPIN | This study          |
| R-SEIPIN-P264X | GAGAAGCGGTGGCGTCACCAGACAG CACCCCA              | "                               | This study          |
| F-SEIPIN-N279X | ACAAAGGGATTGATCACACCACGG                       | "                               | This study          |
| R-SEIPIN-N279X | CCGTGGTGTGATCAATCCCTTTGT                       | "                               | This study          |
| F-SEIPIN-P293X | TCTCGCGCCATCAGTGAGGTCAGGAA TCTAC               | "                               | This study          |
| R-SEIPIN-P293X | GTAGATTCCTGACCTCACTGATGGCG CGAGA               | "                               | This study          |
| F-36B4         | CCCACTTACTGAAAAGGTCA                           | Mammalian qRT-PCR               | Designed by Dr. Fei |
| R-36B4         | TTAGTCGAAGAGACCGAATC                           | "                               | "                   |
| F-ap2          | ACATGAAAGAAGTGGGAGTG                           | "                               | "                   |
| R-ap2          | GGTTATGATGCTCTTCACCT                           | "                               | "                   |
| F-Bscl2        | GTCTCACTGGCTAAGAGTGG                           | "                               | "                   |
| R-Bscl2        | ATCACTGAGCGTGAAGAAGT                           | "                               | "                   |
| F-C/ebpα       | CAAGAACAGCAACGAGTACC                           | "                               | "                   |
| R-C/ebpα       | TTGACCAAGGAGCTCTCAG                            | "                               | "                   |
| F- Pparγ       | ACCACAGTTGATTTCTCCAG                           | "                               | "                   |
| R- Pparγ       | TAGAGCTGGGTCTTTTCAGA                           | "                               | "                   |
| F-Pref-1       | CCATGAAAGAGCTCAACAAG                           | "                               | "                   |
| R-Pref-1       | TACTGCAACAGGAGGTTCTT                           | "                               | "                   |
| F-Gpat3        | GGAGGATGAAGTGACCCAGA                           | "                               | "                   |
| R-Gpat3        | CCAGTTTTTGAGGCTGCTGT                           | "                               | "                   |
| F-Gpat4        | TGTCTGGTTTGAGCGTTCTG                           | "                               | "                   |
| R-Gpat4        | TTCTGGGAAGATGAGGATGG                           | "                               | "                   |
| F-TCM1-ORF     | CCAGAGCTGGTCAAAGAGGT                           | Yeast qRT-PCR                   | "                   |
| R-TCM1-ORF     | ACCGTAGTGGACGAAACCAC                           | "                               | "                   |
| F-INO1-ORF2    | GTATTAAACCGGTCTCCATTGC                         | "                               | "                   |
| R-INO1-ORF2    | CCGACGGGCTTCATATATTG                           | "                               | "                   |

**Table S4. Primer sets used for qRT-PCR.****Related to Experimental Procedures and Figures 3 - 6.**

| Primer ID        | 5'-3' sequence             | Purpose           | Origin                   |
|------------------|----------------------------|-------------------|--------------------------|
| F-36B4           | CCCACTTACTGAAAAGGTCA       | Mammalian qRT-PCR | Designed by Dr. S. Fei   |
| R-36B4           | TTAGTCGAAGAGACCGAAT<br>C   | "                 | "                        |
| F-ap2            | ACATGAAAGAAGTGGGAGT<br>G   | "                 | "                        |
| R-ap2            | GGTTATGATGCTCTTCACCT       | "                 | "                        |
| F-Bscl2          | GTCTCACTGGCTAAGAGTG<br>G   | "                 | "                        |
| R-Bscl2          | ATCACTGAGCGTGAAGAAG<br>T   | "                 | "                        |
| F-C/ebp $\alpha$ | CAAGAACAGCAACGAGTAC<br>C   | "                 | "                        |
| R-C/ebp $\alpha$ | TTGACCAAGGAGCTCTCAG        | "                 | "                        |
| F- Ppary         | ACCACAGTTGATTTCTCCAG       | "                 | "                        |
| R- Ppary         | TAGAGCTGGGTCTTTTCAGA       | "                 | "                        |
| F-Pref-1         | CCATGAAAGAGCTCAACAA<br>G   | "                 | "                        |
| R-Pref-1         | TACTGCAACAGGAGGTTCTT       | "                 | "                        |
| F-Gpat3          | GGAGGATGAAGTGACCCAG<br>A   | "                 | (Lu et al., 2010)        |
| R-Gpat3          | CCAGTTTTTGAGGCTGCTGT       | "                 | "                        |
| F-Gpat4          | TGTCTGGTTTGAGCGTTCTG       | "                 | "                        |
| R-Gpat4          | TTCTGGGAAGATGAGGATG<br>G   | "                 | "                        |
| F-TCM1-ORF       | CCAGAGCTGGTCAAAGAGG<br>T   | Yeast qRT-PCR     | (Shetty and Lopes, 2010) |
| R-TCM1-ORF       | ACCGTAGTGGACGAAACCA<br>C   | "                 | "                        |
| F-INO1-ORF2      | GTATTAAACCGGTCTCCATT<br>GC | "                 | "                        |
| R-INO1-ORF2      | CCGACGGGCTTCATATATTT<br>G  | "                 | "                        |

**Table S5. Yeast and mammalian expression plasmids.**  
**Related to Experimental Procedures and Figures 1, 2, 4, 6.**

| <b>Plasmid ID</b>          | <b>Backbone</b> | <b>Insert</b>        | <b>Purpose</b>                               | <b>Origin</b>            |
|----------------------------|-----------------|----------------------|----------------------------------------------|--------------------------|
| GAT1-V5-pYESNTB            | pYESNTB         | GAT1-V5              | Co-IP, LD study                              | (Pagac et al., 2012)     |
| GAT2-V5-pYESNTB            | pYESNTB         | GAT2-V5              | Co-IP, LD study                              | This study               |
| FLD1-Flag-pESC-HIS         | pESC-HIS        | FLD1-Flag            | Co-IP, LD study                              | This study               |
| GAT1-V5-YCplac111          | YCplac111       | GAT1-V5              | Co-IP experiments                            | This study               |
| SLC4-V5-pYES2NTB           | pYESNTB         | SLC4-V5              | Co-IP experiments                            | (Benghezal et al., 2007) |
| FLD1-Flag-YCplac111        | YCplac111       | FLD1-Flag            | Co-IP experiments                            | This study               |
| FLD1-Flag-YCplac33         | YCplac33        | FLD1-Flag            | Co-IP experiments                            | This study               |
| GPAT4-Myc-Flag-pBABE-puro  | pBABE-puro      | mouse GPAT4-Myc-Flag | Co-IP, LD study, differentiation experiments | This study               |
| GPAT3-Myc-Flag-pBABE-puro  | pBABE-puro      | mouse GPAT3-Myc-Flag | LD study, differentiation experiments        | This study               |
| GPAT4-Myc-Flag-pCMV6-Entry | pCMV6-Entry     | mouse GPAT4-Myc-Flag | Co-IP, PLA assay                             | Origene                  |
| GPAT3-Myc-Flag-pCMV6-Entry | pCMV6-Entry     | mouse GPAT3-Myc-Flag | Co-IP, PLA assay                             | Origene                  |
| HA-SEIPIN-P264X-pBABE      | pBABE-puro      | HA-SEIPIN-P264X      | Co-IP                                        | This study               |
| HA-SEIPIN-N279X-pBABE      | pBABE-puro      | HA-SEIPIN-N279X      | Co-IP                                        | This study               |
| HA-SEIPIN-P293X-pBABE      | pBABE-puro      | HA-SEIPIN-P293X      | Co-IP                                        | This study               |
| HA-SEIPIN-pBABE            | pBABE-puro      | HA-seipin            | Co-IP, differentiation, LD study             | This study               |
| Flag-SEIPIN-pBABE          | pBABE-puro      | Flag-seipin          | Co-IP, BirA                                  | This study               |
| HA-SEIPIN C-term (335-443) | pBABE-puro      | HA seipin (335-443)  | Co-IP, PLA                                   | This study               |
| HA-SEIPIN-T78A             | pBABE-puro      | HA-seipin T78A       | Co-IP                                        | This study               |
| HA-SEIPIN-A212P            | pBABE-puro      | HA-seipin A212P      | Co-IP                                        | This study               |
| HA-SEIPIN-P264X            | pBABE-puro      | HA-seipin P264X      | Co-IP                                        | This study               |
| HA-SEIPIN-N279X            | pBABE-puro      | HA-seipin N279X      | Co-IP                                        | This study               |
| HA-SEIPIN-P293X            | pBABE-puro      | HA-seipin P293X      | Co-IP                                        | This study               |
| Flag-AGPAT2-pBABE          | pBABE-puro      | Flag-AGPAT2          | PLA                                          | This study               |
| BirA-Flag                  | pBABE-puro      | BirA-Flag            | BirA                                         | This study               |
| SEIPIN-BirA-Flag           | pBABE-puro      | Seipin-BirA-Flag     | BirA                                         | This study               |

**Table S6. Antibodies used for Western blotting and immunoprecipitations. Related to Experimental Procedures and Figures 1, 2, 3, 4, 6.**

| <b>Antibody ID</b>                | <b>Antigen</b>        | <b>Host</b> | <b>Purpose</b> | <b>Origin</b>            | <b>Catalog No</b> |
|-----------------------------------|-----------------------|-------------|----------------|--------------------------|-------------------|
| Rabbit Polyclonal AGPAT6 Antibody | AGPAT6/GPAT 4 (human) | Rabbit      | WB             | Origene                  | TA309568          |
| Anti-DDK (Flag)                   | Flag                  | mouse       | Co-IP, WB      | Origene                  | TA50011           |
| Anti-HA Antibody                  | HA                    | Rabbit      | Co-IP, WB      | Cell Signaling           | 3724              |
| Anti-HA Antibody                  | HA                    | Mouse       | Co-IP, WB      | Covance                  | MMS-101P          |
| Anti-Flag Antibody                | Flag                  | Mouse       | Co-IP, WB      | Clontech                 | 635691            |
| Anti-V5 Antibody                  | V5                    | Mouse       | Co-IP, WB      | Santa Cruz Biotechnology | Sc-58052          |
| Anti-V5 Antibody                  | V5                    | Rabbit      | Co-IP, WB      | Santa Cruz Biotechnology | Sc-83849          |
| Anti-Calnexin Antibody            | Calnexin              | Rabbit      | WB             | Cell Signaling           | 2433              |
| Anti-Calreticulin Antibody        | Calreticulin          | Rabbit      | WB             | Abcam                    | ab4               |
| Anti-Actin Antibody               | Actin                 | Rabbit      | WB             | Cell Signaling           | 9272              |
| Anti-GAPDH                        | GAPDH                 | Rabbit      | WB             | Cell Signaling           | 5174              |
| Anti-Dpm1 Antibody                | Dpm1 (Yeast)          | Mouse       | WB             | Life Technologies        | A-6429            |
| Anti-Ldb16 Antibody               | Ldb16 (Yeast)         | Rabbit      | WB             | Wang CW et al., 2014     |                   |
| Anti-Erg1 Antibody                | Erg1 (Yeast)          | Rabbit      | WB             | Wang CW et al., 2014     |                   |
| Anti-Pgk1 Antibody                | Pgk1 (Yeast)          | Mouse       | WB             | Life Technologies        | 459250            |

## Table S7. shRNA plasmids.

Related to Experimental Procedures and Figures 3, 4, 6.

| shRNA ID                         | 5'-3' sequence                                                             | Target                | Purpose                                                                | Origin        |
|----------------------------------|----------------------------------------------------------------------------|-----------------------|------------------------------------------------------------------------|---------------|
| pLKO.1-CMV-neo- <i>Bsc12</i>     | CCGGAGTAGAACT<br>CTACTCTGACTAC<br>TCGAGTAGTCAGA<br>GTAGAGTTCTACT<br>TTTTTG | Mouse<br><i>Bsc12</i> | Lentiviral KD<br>of <i>Bsc12</i> for<br>differentiation<br>experiments | Sigma-Aldrich |
| pLKO.1- <i>Gpat3</i><br>shRNA(c) | CCGGCCTCTCCCA<br>TTGATGTCCTAAC<br>TCGAGTTAGGACA<br>TCAATGGGAGAGG<br>TTTTTG | Mouse<br><i>Gpat3</i> | Lentiviral KD<br>of <i>Gpat3</i> for<br>differentiation<br>experiments | Sigma-Aldrich |
| pLKO.1- <i>Gpat3</i><br>shRNA(d) | CCGGGAAGAATTA<br>CAGCAAGATGATC<br>TCGAGATCATCTT<br>GCTGTAATTCTTC<br>TTTTTG | Mouse<br><i>Gpat3</i> | Lentiviral KD<br>of <i>Gpat3</i> for<br>differentiation<br>experiments | Sigma-Aldrich |
| pLKO.1- <i>Gpat4</i><br>shRNA(b) | CCGGCCTGCCAAA<br>TGGGAGATTTAAC<br>TCGAGTTAAATCT<br>CCCATTTGGCAGG<br>TTTTTG | Mouse<br><i>Gpat4</i> | Lentiviral KD<br>of <i>Gpat4</i> for<br>differentiation<br>experiments | Sigma-Aldrich |
| pLKO.1- <i>Gpat4</i><br>shRNA(c) | CCGGGCAGAAGC<br>TATATAGCAAGAT<br>CTCGAGATCTTGC<br>TATATAGCTTCTG<br>CTTTTTG | Mouse<br><i>Gpat4</i> | Lentiviral KD<br>of <i>Gpat4</i> for<br>differentiation<br>experiments | Sigma-Aldrich |
| pLKO.1-<br>Scrambled<br>shRNA    | CCTAAGGTAAAGT<br>CGCCCTCGCTCGA<br>GCGAGGGCGACT<br>TAACCTTAGG               | None                  | Control shRNA                                                          | Addgene       |
